# Supplementary material
Source: Springer Nature journal article supplement (https://www.springermedizin.de/resource/supplementary/12883_2009_397_MOESM3_ESM.pdf/9455062)

Number of studies

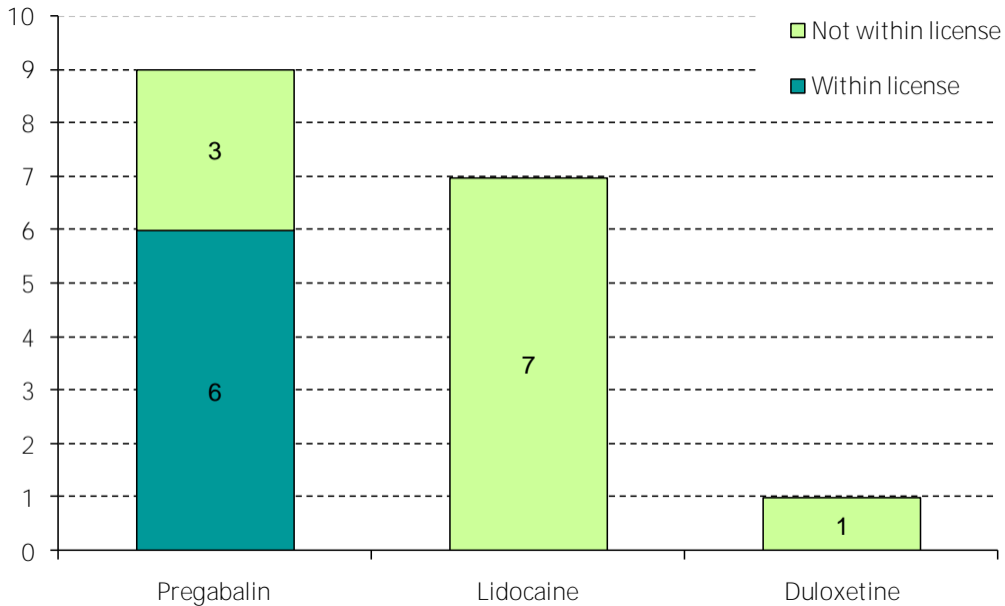

Supplement: MOESM3 [file 9455062]
